# Supplementary material for: A Semi-Supervised Method for Predicting Transcription Factor–Gene Interactions in Escherichia coli
Source: PLoS Comput Biol. 2008 Mar 28;4(3):e1000044. doi: 10.1371/journal.pcbi.1000044 (PMC2266799; doi:10.1371/journal.pcbi.1000044)
Supplement: Table S1 Transcription Factors Included in the Study — For each transcription factor, the table contains information including whether a motif was available for it, the total number of curated direct evidence targets (the number of predicted targets was the same), and the distribution of activator and repressor targets among these curated and predicted targets. (0.03 MB XLS) [file pcbi.1000044.s003.xls]

## Sheet: Sheet1
TF	Motif Available in RegulonDB (1 - yes; 0 - no)	Number of Curated Targets	Number of Curated Activated Targets	Number of Curated Repressed Targets	Number of Curated Dual Targets	Number of New Activated Predictions	Number of New Repressed Predictions	Number of Curated Activated Targets Predicted to be Activated	Number of Curated Activated Targets Predicted to be Repressed	Number of Curated Repressed Targets Predicted to be Repressed	Number Curated Repressed Targets Predicted to be Activated	Number of Curated Dual Targets Predicted to be Activated	Number of Curated Dual Targets Predicted to be Repressed
CRP	1	252	191	30	31	224	28	183	8	23	7	28	3
IHF	1	161	96	43	22	118	43	92	4	26	17	20	2
Fis	1	133	104	25	4	133	0	104	0	17	8	4	0
FNR	1	92	58	24	10	77	15	58	0	19	5	6	4
ArcA	1	60	4	48	8	0	60	2	2	48	0	0	8
H-NS	1	58	9	48	1	0	58	5	4	48	0	0	1
NarL	1	50	14	29	7	10	40	9	5	29	0	0	7
Lrp	1	48	26	18	4	36	12	22	4	13	5	2	2
ModE	1	41	31	10	0	40	1	31	0	6	4	0	0
CpxR	1	40	26	14	0	32	8	26	0	13	1	0	0
ArgR	1	32	5	27	0	2	30	5	0	27	0	0	0
FruR	1	30	8	19	3	11	19	6	2	19	0	0	3
NarP	1	29	11	3	15	29	0	11	0	2	1	15	0
FlhDC	1	27	27	0	0	27	0	27	0	0	0	0	0
IscR	1	26	7	19	0	11	15	7	0	19	0	0	0
Fur	1	23	1	21	1	0	23	0	1	21	0	0	1
PurR	1	23	0	23	0	0	23	0	0	23	0	0	0
CysB	1	20	14	6	0	20	0	14	0	6	0	0	0
PhoB	1	19	13	1	5	19	0	13	0	1	0	5	0
FhlA	1	18	18	0	0	18	0	18	0	0	0	0	0
NagC	1	18	0	16	2	0	18	0	0	16	0	0	2
LexA	1	17	0	17	0	0	17	0	0	17	0	0	0
OxyR	1	16	14	2	0	16	0	14	0	1	1	0	0
GadE	1	14	14	0	0	14	0	14	0	0	0	0	0
SoxS	1	14	13	1	0	14	0	13	0	1	0	0	0
RcsAB	1	13	11	2	0	13	0	11	0	2	0	0	0
PaaX	0	12	0	12	0	0	12	0	0	12	0	0	0
PhoP	1	12	8	1	3	12	0	8	0	0	1	3	0
TrpR	1	12	0	12	0	0	12	0	0	12	0	0	0
AgaR	1	11	0	11	0	0	11	0	0	11	0	0	0
FadR	1	11	3	8	0	1	10	2	1	7	1	0	0
NtrC	1	11	5	0	6	11	0	5	0	0	0	6	0
AllR	0	10	0	10	0	0	10	0	0	10	0	0	0
CaiF	1	10	10	0	0	10	0	10	0	0	0	0	0
CytR	1	10	0	8	2	0	10	0	0	8	0	0	2
DnaA	1	10	3	7	0	0	10	2	1	7	0	0	0
MarA	1	10	6	4	0	6	4	6	0	4	0	0	0
OmpR	1	10	6	3	1	10	0	6	0	3	0	0	1
TyrR	1	10	1	8	1	2	8	1	0	8	0	0	1
Cbl	0	9	9	0	0	9	0	9	0	0	0	0	0
DgsA	1	9	0	9	0	0	9	0	0	9	0	0	0
GlpR	1	9	0	9	0	0	9	0	0	9	0	0	0
MalT	1	9	9	0	0	9	0	9	0	0	0	0	0
YiaJ	0	9	0	9	0	0	9	0	0	9	0	0	0
AraC	1	8	4	0	4	8	0	4	0	0	0	4	0
Rob	1	8	8	0	0	8	0	8	0	0	0	0	0
BaeR	0	7	7	0	0	7	0	7	0	0	0	0	0
DcuR	1	7	7	0	0	7	0	7	0	0	0	0	0
EvgA	0	7	7	0	0	7	0	7	0	0	0	0	0
PspF	1	7	6	1	0	7	0	6	0	1	0	0	0
TorR	1	7	6	1	0	7	0	6	0	1	0	0	0
UlaR	1	7	0	7	0	0	7	0	0	7	0	0	0
ChbR	0	6	0	0	6	0	6	0	0	0	0	0	6
CusR	0	6	6	0	0	6	0	6	0	0	0	0	0
GalS	1	6	0	2	4	0	6	0	0	2	0	0	4
HcaR	0	6	5	1	0	5	1	5	0	1	0	0	0
MhpR	0	6	6	0	0	6	0	6	0	0	0	0	0
NikR	0	6	0	6	0	0	6	0	0	6	0	0	0
RbsR	0	6	0	6	0	0	6	0	0	6	0	0	0
SgrR	0	6	2	4	0	0	6	1	1	4	0	0	0
TdcA	0	6	6	0	0	6	0	6	0	0	0	0	0
TdcR	0	6	6	0	0	6	0	6	0	0	0	0	0
XylR	1	6	6	0	0	6	0	6	0	0	0	0	0
ArgP	1	5	5	0	0	5	0	5	0	0	0	0	0
BirA	0	5	0	5	0	0	5	0	0	5	0	0	0
DeoR	1	5	0	5	0	0	5	0	0	5	0	0	0
EnvY	0	5	5	0	0	5	0	5	0	0	0	0	0
GalR	1	5	0	1	4	0	5	0	0	1	0	0	4
GlcC	0	5	4	1	0	5	0	4	0	1	0	0	0
MetJ	1	5	0	5	0	0	5	0	0	5	0	0	0
NanR	1	5	0	5	0	0	5	0	0	5	0	0	0
NhaR	1	5	5	0	0	5	0	5	0	0	0	0	0
AdA	1	4	4	0	0	4	0	4	0	0	0	0	0
CsgD	1	4	4	0	0	4	0	4	0	0	0	0	0
CynR	0	4	3	1	0	4	0	3	0	0	1	0	0
GadW	0	4	0	4	0	0	4	0	0	4	0	0	0
GadX	0	4	4	0	0	4	0	4	0	0	0	0	0
GcvA	1	4	0	1	3	0	4	0	0	1	0	0	3
GntR	1	4	0	4	0	0	4	0	0	4	0	0	0
HU	0	4	0	4	0	0	4	0	0	4	0	0	0
LrhA	0	4	2	2	0	0	4	2	0	2	0	0	0
MetR	1	4	3	1	0	4	0	3	0	0	1	0	0
PdhR	1	4	0	4	0	0	4	0	0	4	0	0	0
AcrR	0	3	0	3	0	0	3	0	0	3	0	0	0
AllS	0	3	3	0	0	3	0	3	0	0	0	0	0
ArsR	0	3	0	3	0	0	3	0	0	3	0	0	0
IclR	1	3	0	3	0	0	3	0	0	3	0	0	0
KdpE	0	3	3	0	0	3	0	3	0	0	0	0	0
LacI	1	3	0	3	0	0	3	0	0	3	0	0	0
MalI	0	3	0	3	0	0	3	0	0	3	0	0	0
MarR	0	3	0	3	0	0	3	0	0	3	0	0	0
MelR	1	3	0	0	3	3	0	0	0	0	0	0	3
MngR	0	3	0	3	0	0	3	0	0	3	0	0	0
MprA	0	3	0	3	0	0	3	0	0	3	0	0	0
Nac	1	3	2	1	0	2	1	2	0	1	0	0	0
NorR	1	3	2	1	0	3	0	2	0	1	0	0	0
RhaS	1	3	3	0	0	3	0	3	0	0	0	0	0
SdiA	1	3	0	2	1	0	3	0	0	2	0	0	1
SoxR	0	3	2	1	0	2	1	2	0	1	0	0	0
UxuR	0	3	0	3	0	0	3	0	0	3	0	0	0
YdeO	0	3	3	0	0	3	0	3	0	0	0	0	0
ZraR	0	3	3	0	0	3	0	3	0	0	0	0	0
Zur	0	3	0	3	0	0	3	0	0	3	0	0	0
CadC	0	2	2	0	0	2	0	2	0	0	0	0	0
CueR	1	2	2	0	0	2	0	2	0	0	0	0	0
FabR	0	2	0	2	0	0	2	0	0	2	0	0	0
HdfR	0	2	0	2	0	0	2	0	0	2	0	0	0
HipB	1	2	0	2	0	0	2	0	0	2	0	0	0
IlvY	0	2	1	1	0	0	2	1	0	1	0	0	0
QseB	0	2	2	0	0	2	0	2	0	0	0	0	0
RhaR	0	2	2	0	0	2	0	2	0	0	0	0	0
TreR	0	2	0	2	0	0	2	0	0	2	0	0	0
AlaS	0	1	0	1	0	0	1	0	0	1	0	0	0
CspA	1	1	1	0	0	1	0	1	0	0	0	0	0
KdgR	0	1	0	1	0	0	1	0	0	1	0	0	0
MntR	0	1	0	1	0	0	1	0	0	1	0	0	0
NadR	0	1	0	1	0	0	1	0	0	1	0	0	0
NsrR	1	1	0	1	0	0	1	0	0	1	0	0	0
PutA	0	1	0	1	0	0	1	0	0	1	0	0	0
RcnR	0	1	0	1	0	0	1	0	0	1	0	0	0
SlyA	0	1	1	0	0	1	0	1	0	0	0	0	0
UhpA	0	1	1	0	0	1	0	1	0	0	0	0	0
ZntR	0	1	1	0	0	1	0	1	0	0	0	0	0
